# Supplementary material
Source: HighWire-hosted journal article supplement (https://qualitysafety.bmj.com/content/29/2/103)

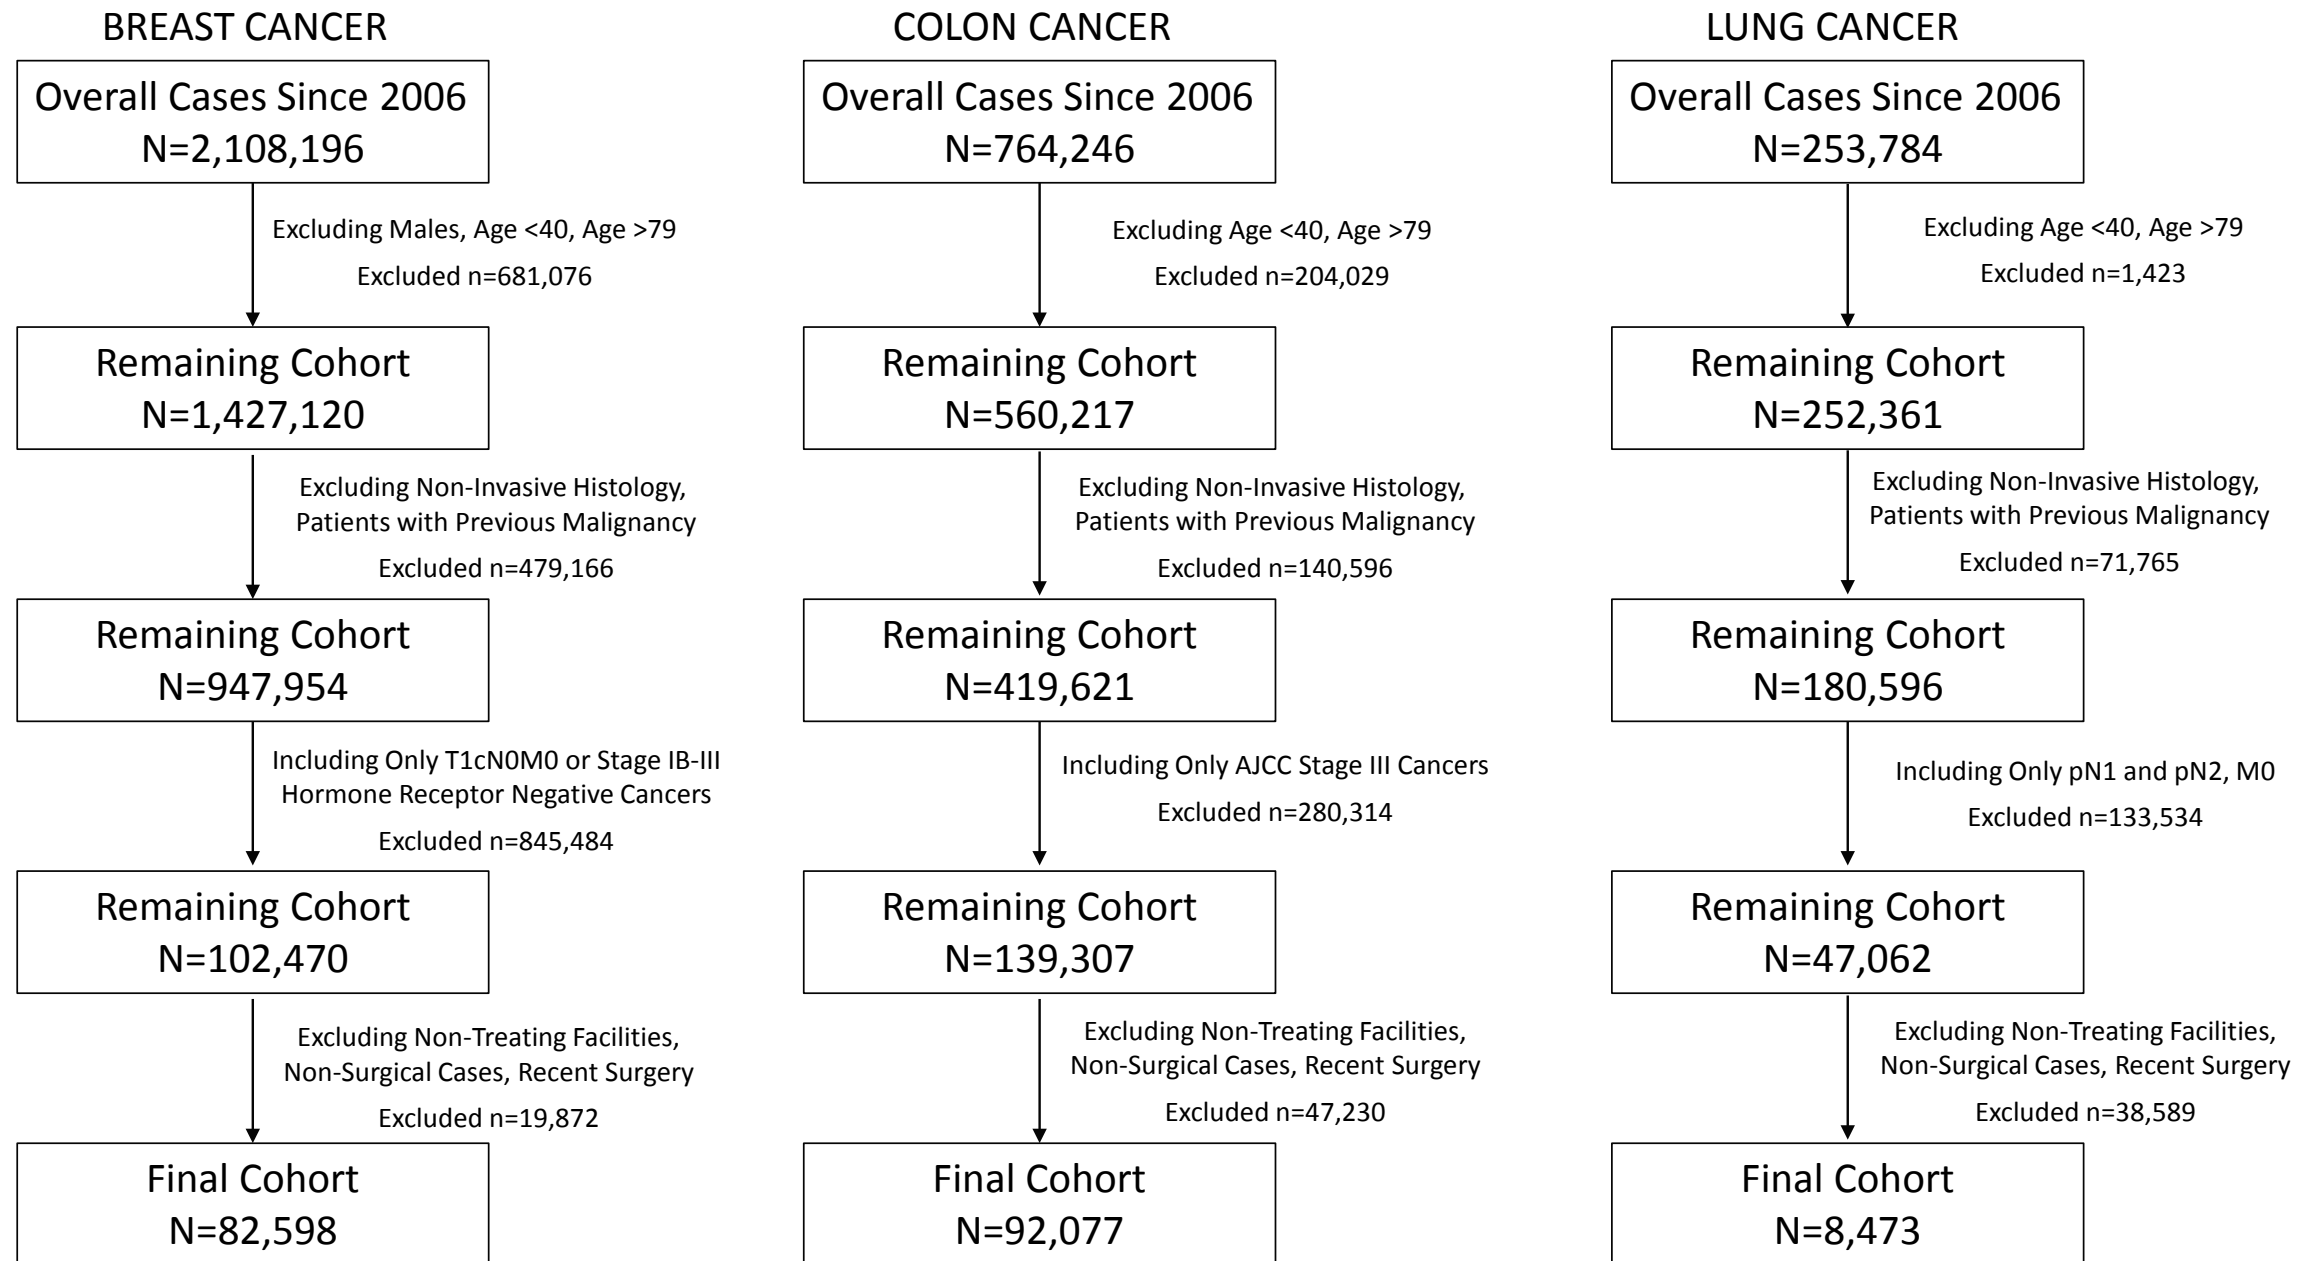

Supplement: inline-supplementary-material-1 [file inline-supplementary-material-1.pdf]
